# Supplementary material for: Application of Modelling and Simulation Approaches to Predict Pharmacokinetics of Therapeutic Monoclonal Antibodies in Pediatric Population
Source: MDPI journal article supplement (doi:10.3390/pharmaceutics15051552), 2023-05-20
Supplement: s1 [file s1]

**Table S1. List of therapeutics monoclonal antibodies that have been approved for adult and/or pediatric usage by FDA or EMA (as of Sep 2022).**

| Therapeutic mAbs approved for adult usage by EMA or FDA |                               |                                           |                       |                                                               |                                                     |
|---------------------------------------------------------|-------------------------------|-------------------------------------------|-----------------------|---------------------------------------------------------------|-----------------------------------------------------|
| <i>mAbs approved for pediatric usage</i>                |                               | <i>mAbs approved for adult usage only</i> |                       |                                                               |                                                     |
| Rituximab                                               | Blinatumomab                  | Abciximab                                 | Idarucizumab          | Ibalizumab, ibalizumab-uiyk                                   | Anifrolumab, anifrolumab-fnia                       |
| Basiliximab                                             | Evolocumab                    | Trastuzumab                               | Necitumumab           | Moxetumomab pasudotox, moxetumomab pasudotox-tdfk             | Loncastuximab tesirine, loncastuximab tesirine-lpyl |
| Infliximab                                              | Dinutuximab                   | Ibritumomab tiuxetan                      | Alirocumab            | Caplacizumab, caplacizumab-yhdp                               | Margetuximab-cmkb                                   |
| Adalimumab                                              | Secukinumab                   | Cetuximab                                 | Daratumumab           | Risankizumab, risankizumab-rzaa                               | Aducanumab, aducanumab-avwa                         |
| Eculizumab                                              | Obiltoxaximab                 | Bevacizumab                               | Elotuzumab            | Polatuzumab vedotin, polatuzumab vedotin-piiq                 | Regdanvimab                                         |
| Ustekinumab                                             | Avelumab                      | Natalizumab                               | Reslizumab            | Romosozumab, romosozumab-aqqg                                 | Tisotumab vedotin, tisotumab vedotin-tftv           |
| Canakinumab                                             | Emicizumab                    | Panitumumab                               | Bezlotoxumab          | Brolucizumab, brolucizumab-dblI                               | Tebentafusp, tebentafusp-tebn                       |
| Golimumab                                               | Benralizumab                  | Ranibizumab                               | Atezolizumab          | Enfortumab vedotin, enfortumab vedotin-ejfv                   | Faricimab, faricimab-svoa                           |
| Belimumab                                               | Burosumab, burosumab-twza     | Certolizumab pegol                        | Brodalumab            | [fam-]trastuzumab deruxtecan, fam-trastuzumab deruxtecan-nxki | Sutimlimab, sutimlimab-jome                         |
| Mepolizumab                                             | Lanadelumab-flyo              | Ofatumumab                                | Inotuzumab ozogamicin | Isatuximab, isatuximab-irfc                                   | Tixagevimab, cilgavimab                             |
|                                                         | Ravulizumab, ravulizumab-cwvz | Tocilizumab                               | Guselkumab            | Belantamab mafodotin, belantamab mafodotin-blmf               | Bimekizumab                                         |

### Therapeutic mAbs approved for adult usage by EMA or FDA

| <i>mAbs approved for pediatric usage</i> |                                              | <i>mAbs approved for adult usage only</i> |                                   |                                                   |                         |
|------------------------------------------|----------------------------------------------|-------------------------------------------|-----------------------------------|---------------------------------------------------|-------------------------|
| Ixekizumab                               | Emapalumab, emapalumab-lzsg                  | Denosumab                                 | Sarilumab                         | Sacituzumab govitecan; sacituzumab govitecan-hziy | Casirivimab + imdevimab |
| Dupilumab                                | Evinacumab                                   | Brentuximab vedotin                       | Ocrelizumab                       | Tafasitamab, tafasitamab-cxix                     | Mosunetuzumab           |
| Gemtuzumab ozogamicin                    | Atoltivimab, maftivimab, and odesivimab-ebgn | Pertuzumab                                | Erenumab, erenumab-aooe           | Satralizumab, satralizumab-mwge                   | Teclistamab             |
| Crizanlizumab; crizanlizumab-tmca        | Naxitamab-gqgk                               | Ado-trastuzumab emtansine                 | Galcanezumab, galcanezumab-gnlm   | Eptinezumab, eptinezumab-jjmr                     | Spesolimab              |
| Omalizumab                               | Ansuvimab-zykl                               | Obinutuzumab                              | Mogamulizumab, mogamulizumab-kpkc | Inebilizumab, inebilizumab-cdon                   |                         |
| Raxibacumab                              | Sotrovimab                                   | Siltuximab                                | Tildrakizumab; tildrakizumab-asmn | Teprotumumab, teprotumumab-trbw                   |                         |
| Nivolumab                                | Tezepelumab, tezepelumab-ekko                | Ramucirumab                               | Fremanezumab, fremanezumab-vfrm   | Dostarlimab, dostarlimab-gxly                     |                         |
| Pembrolizumab                            | Relatlimab                                   | Vedolizumab                               | Cemiplimab, cemiplimab-rwlc       | Amivantamab, amivantamab-vmjw                     |                         |
| Ipilimumab                               |                                              | Alemtuzumab                               |                                   | Tralokinumab, tralokinumab-ldrm                   |                         |
